# Supplementary material for: Nicotinamide drives T cell activation in the mammary tumor microenvironment
Source: Springer Nature journal article supplement (doi:10.1186/s12967-022-03454-z), 2022-06-03
Supplement: MOESM1 [file 23125416]

**Supplemental Table 1. Genes of interest differentially expressed in T cells from NAM-treated vs control TS/A tumors.**

| <b>Gene</b>    | <b>log<sub>2</sub>(FC)</b> | <b>p value</b> | <b>- log<sub>10</sub>(p value)</b> |
|----------------|----------------------------|----------------|------------------------------------|
| <i>Klrc1</i>   | 0.55                       | 9.26E-04       | 3.03                               |
| <i>Klrc2</i>   | 0.49                       | 1.70E-03       | 2.77                               |
| <i>Fasl</i>    | 0.48                       | 3.17E-03       | 2.5                                |
| <i>Gzmb</i>    | 0.47                       | 4.78E-03       | 2.32                               |
| <i>Cd8a</i>    | 0.46                       | 2.42E-03       | 2.62                               |
| <i>Ifi47</i>   | 0.42                       | 2.32E-03       | 2.63                               |
| <i>Nkg7</i>    | 0.42                       | 3.50E-03       | 2.46                               |
| <i>Mif</i>     | 0.41                       | 4.49E-06       | 5.35                               |
| <i>Pdcd1</i>   | 0.38                       | 4.90E-02       | 1.31                               |
| <i>Ndufb2</i>  | 0.37                       | 3.01E-03       | 2.52                               |
| <i>Cox6a1</i>  | 0.37                       | 1.04E-06       | 5.98                               |
| <i>Klrd1</i>   | 0.36                       | 1.59E-02       | 1.8                                |
| <i>Cd3e</i>    | 0.35                       | 1.67E-04       | 3.78                               |
| <i>Cd8b1</i>   | 0.29                       | 2.50E-02       | 1.6                                |
| <i>Lck</i>     | 0.27                       | 2.60E-03       | 2.59                               |
| <i>Ndufaf4</i> | 0.26                       | 1.85E-02       | 1.73                               |
| <i>Ndufs8</i>  | 0.25                       | 2.26E-02       | 1.65                               |
| <i>Ldha</i>    | 0.24                       | 2.12E-02       | 1.67                               |
| <i>Atp5j</i>   | 0.24                       | 7.87E-03       | 2.1                                |
| <i>Ndufa13</i> | 0.23                       | 4.00E-03       | 2.4                                |
| <i>Cd3d</i>    | 0.23                       | 6.46E-03       | 2.19                               |
| <i>Cd3g</i>    | 0.20                       | 2.80E-02       | 1.55                               |
| <i>Ccl8</i>    | -0.32                      | 2.21E-02       | 1.66                               |
| <i>Cxcl1</i>   | -0.35                      | 1.04E-04       | 3.98                               |
| <i>Cdk2ap1</i> | -0.38                      | 1.10E-03       | 2.96                               |
| <i>Klf2</i>    | -0.43                      | 4.86E-02       | 1.31                               |
| <i>Lgmn</i>    | -0.44                      | 4.37E-04       | 3.36                               |
| <i>Btg1</i>    | -0.45                      | 1.79E-06       | 5.75                               |
| <i>Gnai2</i>   | -0.50                      | 7.34E-08       | 7.13                               |
| <i>Erdr1</i>   | -0.50                      | 1.70E-03       | 2.77                               |
| <i>Cdkn1b</i>  | -0.55                      | 1.79E-08       | 7.75                               |

**Abbreviations.** FC, fold change; n/a, not applicable; NAM, nicotinamide.
